# Supplementary material for: Low operating temperature toluene sensor based on novel α-Fe2O3/SnO2 heterostructure nanowire arrays
Source: Royal Society of Chemistry journal article supplement (doi:10.1039/c6ra05313k), 2016-01-01
Supplement: c6ra05313k1.pdf [file c6ra05313k1.pdf]

## Low Operating Temperature Toluene Sensor Based on Novel $\alpha$ - $\text{Fe}_2\text{O}_3/\text{SnO}_2$ Heterostructure Nanowires Arrays

Tianshuang Wang,<sup>a</sup> Zhangshu Huang,<sup>a</sup> Zhangduo Yu,<sup>a</sup> Hui Wang,<sup>b</sup> Peng Sun,<sup>\*a</sup> Hui Suo,<sup>a</sup> Yuan Gao,<sup>a</sup> Yanfeng Sun,<sup>a</sup> Tie Li,<sup>\*b</sup> and Geyu Lu<sup>a</sup>

<sup>a</sup> State Key Laboratory on Integrated Optoelectronics, College of Electronic Science and Engineering, Jilin University, 2699 Qianjin Street, Changchun 130012, People's Republic of China. E-mail:

pengsun@jlu.edu.cn; Fax: +86 431 85167808; Tel: +86 431 85167808

<sup>b</sup> Technology on Micro-system Laboratory, Shanghai Institute of Micro-system and Information

Technology, Chinese Academy of Sciences, 800 Yishan Road, Xuhui district, Shanghai 200030, People's Republic of China, Email: tli@mail.sim.ac.cn

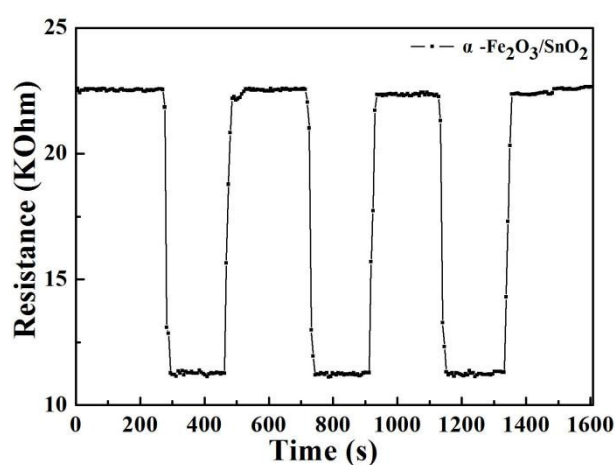

Fig.S1 The repeatability of the  $\alpha$ - $\text{Fe}_2\text{O}_3/\text{SnO}_2$  heterostructure composites sensor toward 100 ppm toluene at 90 °C.
